# Supplementary material
Source: PubMed Central journal article supplement (PMC3696991)
Supplement: NIHMS446785-supplement-Supplement_1.pdf [file NIHMS446785-supplement-Supplement_1.pdf]

## SUPPLEMENTAL MATERIAL

Supplemental Table I: Multivariable-adjusted Interaction of Muscle Attenuation and Metabolic Risk Factor Association with Age

|                              | Interaction with Age | Age ≤ 49 years      |         | Age > 49 Years      |         |
|------------------------------|----------------------|---------------------|---------|---------------------|---------|
|                              |                      | Estimate (95% CI)*  | p-value | Estimate (95% CI)*  | p-value |
| <b>Continuous Variables</b>  |                      |                     |         |                     |         |
| Glucose                      | 0.9                  | 2.12 (0.93, 3.32)   | 0.0005  | 2.32 (1.17, 3.47)   | <0.0001 |
| Log HOMA-IR                  | 0.08                 | 0.04 (0.01, 0.07)   | 0.01    | 0.03 (-0.00, 0.05)  | 0.07    |
| Log Triglycerides            | 0.3                  | 0.08 (0.04, 0.13)   | 0.0005  | 0.04 (0.01, 0.07)   | 0.01    |
| HDL                          | 0.5                  | -0.08 (-1.29, 1.14) | 0.9     | -0.67 (-1.43, 0.01) | 0.09    |
| SBP                          | 0.6                  | 2.52 (1.46, 3.59)   | <0.0001 | 1.04 (0.14, 1.94)   | 0.02    |
| DBP                          | <0.0001              | 1.44 (0.71, 2.18)   | 0.0001  | 0.16 (-0.33, 0.64)  | 0.5     |
| <b>Dichotomous Variables</b> |                      |                     |         |                     |         |
| Insulin Resistance           | <0.0001              | 1.49 (1.20, 1.85)   | 0.0003  | 1.10 (0.97, 1.25)   | 0.1     |
| IFG                          | 0.4                  | 1.08 (0.88, 1.34)   | 0.5     | 1.22 (1.08, 1.37)   | 0.001   |
| Diabetes                     | 0.2                  | 2.00 (1.40, 2.88)   | 0.0002  | 1.25 (1.08, 1.44)   | 0.003   |
| Metabolic Syndrome           | 0.3                  | 1.48 (1.21, 1.80)   | 0.0001  | 1.45 (1.28, 1.64)   | <0.0001 |
| High Triglycerides           | 0.8                  | 1.15 (0.94, 1.41)   | 0.2     | 1.12 (1.00, 1.26)   | 0.04    |
| Low HDL                      | 0.2                  | 1.04 (0.86, 1.27)   | 0.7     | 0.99 (0.88, 1.11)   | 0.8     |
| Hypertension                 | 0.02                 | 1.39 (1.12, 1.72)   | 0.003   | 1.17 (1.05, 1.32)   | 0.006   |

\*Estimates of effect size for continuous variables and of odds ratios of the condition for dichotomous variables per 1 standard deviation decrease in muscle attenuation (overall: 6.6) with 95% confidence interval.

Supplemental Table II – Data stratified by cohort, modeled per 1 SD decrease in muscle HU

|               | Women                |         |                     |         |                      |         | Men                 |         |                     |         |                     |         |
|---------------|----------------------|---------|---------------------|---------|----------------------|---------|---------------------|---------|---------------------|---------|---------------------|---------|
|               | Overall              |         | Offspring           |         | Gen 3                |         | Overall             |         | Offspring           |         | Gen 3               |         |
|               | Estimate (95% CI)    | p-value | Estimate (95% CI)   | p-value | Estimate (95% CI)    | p-value | Estimate (95% CI)   | p-value | Estimate (95% CI)   | p-value | Estimate (95% CI)   | p-value |
| Glucose       |                      |         |                     |         |                      |         |                     |         |                     |         |                     |         |
| Simple        | 2.13 (1.28, 2.99)    | <.0001  | 1.96 (0.81, 3.11)   | 0.0009  | 2.63 (1.29, 3.97)    | 0.0001  | 2.11 (0.76, 3.46)   | 0.002   | 3.12 (1.19, 5.05)   | 0.002   | -0.70 (-3.04, 1.65) | 0.56    |
| +BMI          | 1.06 (0.22, 1.90)    | 0.01    | 1.01 (-0.12, 2.13)  | 0.08    | 1.31 (-0.02, 2.64)   | 0.05    | 1.31 (-0.03, 2.65)  | 0.06    | 2.16 (0.19, 4.12)   | 0.03    | -1.16 (-3.46, 1.13) | 0.32    |
| +VAT (no BMI) | 0.12 (-0.75, 0.99)   | 0.78    | -0.17 (-1.34, 1.00) | 0.78    | 0.71 (-0.64, 2.06)   | 0.30    | 1.22 (-0.14, 2.59)  | 0.08    | 2.27 (0.30, 4.25)   | 0.03    | -1.56 (-3.89, 0.77) | 0.19    |
| Log HOMA-IR   |                      |         |                     |         |                      |         |                     |         |                     |         |                     |         |
| Simple        | 0.05 (0.02, 0.07)    | 0.0004  | 0.05 (0.01, 0.09)   | 0.01    | 0.09 (0.05, 0.12)    | <.0001  | -0.00 (-0.03, 0.03) | 0.98    | 0.02 (-0.02, 0.07)  | 0.28    | -0.01 (-0.05, 0.03) | 0.52    |
| +BMI          | -0.01 (-0.03, 0.02)  | 0.61    | 0.00 (-0.04, 0.04)  | 0.98    | 0.02 (-0.01, 0.05)   | 0.20    | -0.04 (-0.06, 0.01) | 0.003   | -0.03 (-0.07, 0.01) | 0.12    | -0.04 (-0.07, 0.00) | 0.03    |
| +VAT (no BMI) | -0.04 (-0.07, 0.02)  | 0.0003  | -0.04 (-0.08, 0.00) | 0.05    | -0.02 (-0.04, 0.01)  | 0.28    | -0.06 (-0.08, 0.03) | <.0001  | -0.04 (-0.07, 0.00) | 0.08    | -0.07 (-0.11, 0.04) | <.0001  |
| Log Trig      |                      |         |                     |         |                      |         |                     |         |                     |         |                     |         |
| Simple        | 0.09 (0.07, 0.12)    | <.0001  | 0.08 (0.04, 0.12)   | 0.0001  | 0.12 (0.08, 0.17)    | <.0001  | -0.01 (-0.05, 0.02) | 0.48    | -0.01 (-0.05, 0.04) | 0.73    | -0.03 (-0.10, 0.04) | 0.40    |
| +BMI          | 0.05 (0.02, 0.08)    | 0.0003  | 0.04 (0.01, 0.08)   | 0.02    | 0.06 (0.02, 0.11)    | 0.007   | -0.04 (-0.08, 0.01) | 0.01    | -0.04 (-0.08, 0.01) | 0.09    | -0.05 (-0.12, 0.02) | 0.14    |
| +VAT (no BMI) | 0.00 (-0.02, 0.03)   | 0.79    | -0.00 (-0.04, 0.04) | 0.86    | 0.02 (-0.02, 0.07)   | 0.33    | -0.07 (-0.10, 0.03) | 0.0002  | -0.05 (-0.09, 0.00) | 0.05    | -0.10 (-0.16, 0.03) | 0.004   |
| HDL           |                      |         |                     |         |                      |         |                     |         |                     |         |                     |         |
| Simple        | -1.54 (-2.51, -0.57) | 0.002   | -0.84 (-1.99, 0.30) | 0.15    | -1.94 (-3.64, -0.24) | 0.03    | 0.59 (0.17, 1.35)   | 0.13    | 0.33 (0.54, 1.20)   | 0.46    | 2.54 (0.98, 4.09)   | 0.001   |
| +BMI          | -0.24 (-1.20, 0.71)  | 0.62    | 0.04 (-1.09, 1.17)  | 0.95    | 0.05 (-1.62, 1.71)   | 0.96    | 1.29 (0.56, 2.03)   | 0.0006  | 1.08 (0.22, 1.93)   | 0.01    | 3.01 (1.53, 4.50)   | <.0001  |
| +VAT (no BMI) | 0.95 (-0.03, 1.93)   | 0.06    | 1.14 (-0.03, 2.30)  | 0.06    | 1.03 (-0.65, 2.70)   | 0.23    | 1.73 (1.00, 2.46)   | <.0001  | 1.15 (0.30, 2.01)   | 0.008   | 3.92 (2.48, 5.36)   | <.0001  |

|                    |                     |        |                     |        |                    |        |                     |       |                     |       |                     |       |
|--------------------|---------------------|--------|---------------------|--------|--------------------|--------|---------------------|-------|---------------------|-------|---------------------|-------|
| SBP                |                     |        |                     |        |                    |        |                     |       |                     |       |                     |       |
| Simple             | 1.70 (0.76, 2.65)   | 0.0004 | 1.36 (0.04, 2.69)   | 0.04   | 3.10 (1.66, 4.54)  | <.0001 | 0.97 (0.11, 1.83)   | 0.03  | 0.86 (-0.33, 2.06)  | 0.16  | 2.16 (0.62, 3.70)   | 0.006 |
| +BMI               | 0.71 (-0.23, 1.65)  | 0.14   | 0.73 (-0.60, 2.06)  | 0.28   | 1.53 (0.11, 2.94)  | 0.03   | 0.47 (-0.38, 1.32)  | 0.28  | 0.40 (-0.82, 1.62)  | 0.52  | 1.90 (0.42, 3.39)   | 0.01  |
| +VAT (no BMI)      | 0.05 (-0.94, 1.03)  | 0.92   | 0.20 (-1.22, 1.61)  | 0.79   | 0.85 (-0.58, 2.29) | 0.24   | 0.31 (-0.55, 1.17)  | 0.48  | 0.51 (-0.73, 1.74)  | 0.42  | 1.34 (-0.14, 2.82)  | 0.08  |
| DBP                |                     |        |                     |        |                    |        |                     |       |                     |       |                     |       |
| Simple             | 0.58 (0.04, 1.13)   | 0.04   | 0.34 (-0.36, 1.03)  | 0.35   | 1.50 (0.61, 2.38)  | 0.001  | 0.11 (-0.45, 0.67)  | 0.71  | 0.31 (-0.39, 1.01)  | 0.39  | 0.23 (-0.86, 1.32)  | 0.68  |
| +BMI               | 0.03 (-0.52, 0.57)  | 0.92   | 0.02 (-0.68, 0.73)  | 0.95   | 0.61 (-0.27, 1.49) | 0.18   | -0.26 (-0.81, 0.30) | 0.36  | -0.05 (-0.76, 0.66) | 0.89  | 0.06 (-1.00, 1.12)  | 0.91  |
| +VAT (no BMI)      | -0.35 (-0.92, 0.21) | 0.22   | -0.21 (-0.96, 0.53) | 0.58   | 0.15 (-0.74, 1.04) | 0.74   | -0.44 (-1.00, 0.12) | 0.12  | -0.04 (-0.75, 0.67) | 0.92  | -0.38 (-1.42, 0.67) | 0.48  |
| Insulin Resistance |                     |        |                     |        |                    |        |                     |       |                     |       |                     |       |
| Simple             | 1.27 (1.10, 1.47)   | 0.001  | 1.10 (0.91, 1.32)   | 0.32   | 1.86 (1.42, 2.43)  | <.0001 | 1.05 (0.90, 1.22)   | 0.56  | 1.07 (0.89, 1.28)   | 0.46  | 1.05 (0.77, 1.43)   | 0.77  |
| +BMI               | 0.95 (0.80, 1.14)   | 0.60   | 0.83 (0.67, 1.04)   | 0.11   | 1.37 (1.02, 1.84)  | 0.04   | 0.84 (0.70, 1.02)   | 0.08  | 0.84 (0.66, 1.06)   | 0.14  | 0.87 (0.61, 1.24)   | 0.45  |
| +VAT (no BMI)      | 0.72 (0.59, 0.88)   | 0.001  | 0.63 (0.49, 0.82)   | 0.0005 | 1.10 (0.79, 1.53)  | 0.59   | 0.75 (0.62, 0.90)   | 0.002 | 0.82 (0.67, 1.02)   | 0.08  | 0.71 (0.49, 1.01)   | 0.06  |
| IFG                |                     |        |                     |        |                    |        |                     |       |                     |       |                     |       |
| Simple             | 1.31 (1.13, 1.50)   | 0.0002 | 1.25 (1.06, 1.48)   | 0.009  | 1.47 (1.14, 1.89)  | 0.003  | 1.05 (0.92, 1.19)   | 0.49  | 1.04 (0.90, 1.22)   | 0.57  | 1.11 (0.85, 1.45)   | 0.44  |
| +BMI               | 1.14 (0.98, 1.32)   | 0.10   | 1.13 (0.95, 1.36)   | 0.16   | 1.17 (0.87, 1.58)  | 0.30   | 0.98 (0.86, 1.12)   | 0.76  | 0.99 (0.85, 1.16)   | 0.90  | 1.06 (0.81, 1.39)   | 0.68  |
| +VAT (no BMI)      | 0.98 (0.83, 1.16)   | 0.86   | 1.01 (0.84, 1.23)   | 0.89   | 0.99 (0.71, 1.38)  | 0.96   | 0.94 (0.82, 1.07)   | 0.34  | 0.95 (0.81, 1.12)   | 0.57  | 0.98 (0.75, 1.29)   | 0.90  |
| Diabetes           |                     |        |                     |        |                    |        |                     |       |                     |       |                     |       |
| Simple             | 1.34 (1.10, 1.64)   | 0.004  | 1.26 (0.99, 1.59)   | 0.06   | 1.83 (1.25, 2.67)  | 0.002  | 1.26 (1.06, 1.51)   | 0.009 | 1.32 (1.09, 1.61)   | 0.005 | 0.96 (0.54, 1.72)   | 0.90  |
| +BMI               | 1.16 (0.93, 1.45)   | 0.19   | 1.10 (0.86, 1.42)   | 0.45   | 1.55 (0.95, 2.53)  | 0.08   | 1.12 (0.93, 1.35)   | 0.24  | 1.18 (0.97, 1.44)   | 0.10  | 0.83 (0.45, 1.51)   | 0.54  |

|                    |                   |        |                   |        |                   |        |                   |        |                   |       |                   |        |
|--------------------|-------------------|--------|-------------------|--------|-------------------|--------|-------------------|--------|-------------------|-------|-------------------|--------|
| +VAT (no BMI)      | 0.95 (0.74, 1.21) | 0.66   | 0.88 (0.66, 1.17) | 0.38   | 1.44 (0.88, 2.37) | 0.15   | 1.14 (0.94, 1.37) | 0.18   | 1.23 (1.00, 1.51) | 0.048 | 0.79 (0.44, 1.42) | 0.44   |
| Metabolic Syndrome |                   |        |                   |        |                   |        |                   |        |                   |       |                   |        |
| Simple             | 1.85 (1.58, 2.15) | <.0001 | 1.81 (1.49, 2.20) | <.0001 | 1.97 (1.53, 2.54) | <.0001 | 1.10 (0.96, 1.26) | 0.15   | 1.14 (0.97, 1.34) | 0.10  | 1.09 (0.82, 1.43) | 0.56   |
| +BMI               | 1.50 (1.27, 1.77) | <.0001 | 1.56 (1.26, 1.92) | <.0001 | 1.48 (1.11, 1.97) | 0.008  | 0.89 (0.76, 1.03) | 0.12   | 0.92 (0.77, 1.09) | 0.33  | 0.94 (0.68, 1.28) | 0.68   |
| +VAT (no BMI)      | 1.22 (1.02, 1.45) | 0.03   | 1.29 (1.04, 1.60) | 0.02   | 1.17 (0.84, 1.64) | 0.36   | 0.80 (0.68, 0.94) | 0.006  | 0.92 (0.76, 1.10) | 0.34  | 0.73 (0.53, 1.02) | 0.07   |
| High Trig          |                   |        |                   |        |                   |        |                   |        |                   |       |                   |        |
| Simple             | 1.40 (1.22, 1.61) | <.0001 | 1.30 (1.09, 1.54) | 0.003  | 1.60 (1.26, 2.04) | 0.0001 | 0.91 (0.80, 1.03) | 0.15   | 0.94 (0.81, 1.09) | 0.40  | 0.85 (0.66, 1.11) | 0.24   |
| +BMI               | 1.24 (1.07, 1.43) | 0.0036 | 1.19 (1.00, 1.42) | 0.045  | 1.34 (1.03, 1.74) | 0.03   | 0.81 (0.71, 0.94) | 0.004  | 0.84 (0.71, 0.99) | 0.04  | 0.79 (0.60, 1.04) | 0.10   |
| +VAT (no BMI)      | 1.05 (0.89, 1.23) | 0.55   | 1.03 (0.85, 1.24) | 0.79   | 1.13 (0.84, 1.52) | 0.42   | 0.75 (0.65, 0.86) | <.0001 | 0.82 (0.70, 0.97) | 0.02  | 0.67 (0.51, 0.90) | 0.007  |
| Low HDL            |                   |        |                   |        |                   |        |                   |        |                   |       |                   |        |
| Simple             | 1.17 (1.02, 1.34) | 0.02   | 1.09 (0.92, 1.30) | 0.33   | 1.30 (1.04, 1.64) | 0.02   | 0.85 (0.74, 0.99) | 0.04   | 0.86 (0.72, 1.02) | 0.09  | 0.72 (0.52, 0.98) | 0.04   |
| +BMI               | 1.01 (0.87, 1.17) | 0.87   | 0.97 (0.80, 1.17) | 0.73   | 1.07 (0.83, 1.38) | 0.62   | 0.75 (0.64, 0.88) | 0.0005 | 0.74 (0.61, 0.90) | 0.003 | 0.65 (0.47, 0.90) | 0.009  |
| +VAT (no BMI)      | 0.86 (0.73, 1.02) | 0.08   | 0.84 (0.68, 1.03) | 0.09   | 0.93 (0.70, 1.23) | 0.59   | 0.70 (0.59, 0.82) | <.0001 | 0.73 (0.61, 0.89) | 0.002 | 0.56 (0.40, 0.78) | 0.0007 |
| Hypertension       |                   |        |                   |        |                   |        |                   |        |                   |       |                   |        |
| Simple             | 1.29 (1.12, 1.48) | 0.0003 | 1.25 (1.05, 1.48) | 0.01   | 1.47 (1.16, 1.87) | 0.002  | 1.10 (0.95, 1.26) | 0.19   | 1.07 (0.92, 1.26) | 0.38  | 1.29 (0.95, 1.75) | 0.11   |
| +BMI               | 1.11 (0.96, 1.29) | 0.16   | 1.10 (0.92, 1.31) | 0.30   | 1.21 (0.92, 1.59) | 0.17   | 0.99 (0.86, 1.14) | 0.89   | 0.99 (0.84, 1.16) | 0.89  | 1.19 (0.87, 1.63) | 0.28   |
| +VAT (no BMI)      | 0.98 (0.84, 1.15) | 0.85   | 0.97 (0.80, 1.18) | 0.75   | 1.10 (0.82, 1.47) | 0.52   | 0.95 (0.82, 1.09) | 0.46   | 0.98 (0.83, 1.16) | 0.79  | 1.07 (0.77, 1.47) | 0.70   |

Note: Data presented include effect size expressed per 1 standard deviation decrease in muscle attenuation with 95% confidence intervals.

\* All models are adjusted for: age, current smoking status, alcohol use, and physical activity.

Menopausal status and hormone replacement therapy are also included for in models among women.

\*\*

Additional covariate in SBP and DBP model: Hypertension Treatment;

Additional covariate in HDL and TG models: Lipid Lowering Treatment;

Additional covariate for FPG: Treatment for Diabetes.
